# Supplementary material
Source: Springer Nature journal article supplement (https://www.springermedizin.de/resource/supplementary/13256_2011_2124_MOESM9_ESM.pdf/9649076)

OD

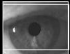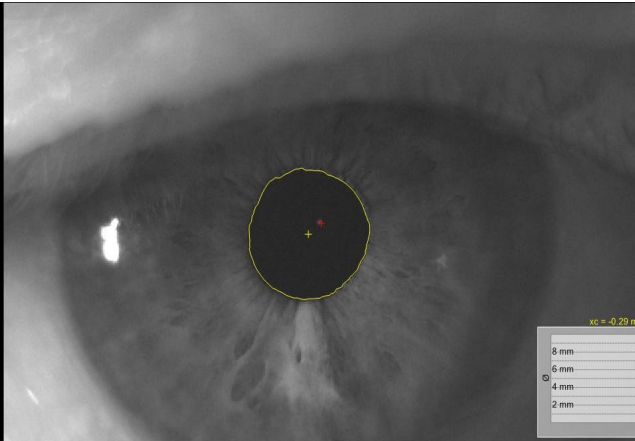

$x_c = -0.29 \text{ mm}$ ,  $y_c = 0.22 \text{ mm}$ ,  $\varnothing = 2.62 \text{ mm}$

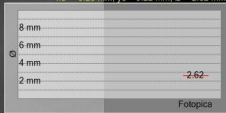

Supplement: MOESM9 [file 9649076]
